# Supplementary material
Source: ML conference proceedings conference paper supplement (https://openreview.net/forum?id=R5fIRVlAi_H)

$|\mathbb{E}[u|s]|$  on Expert Trajs.

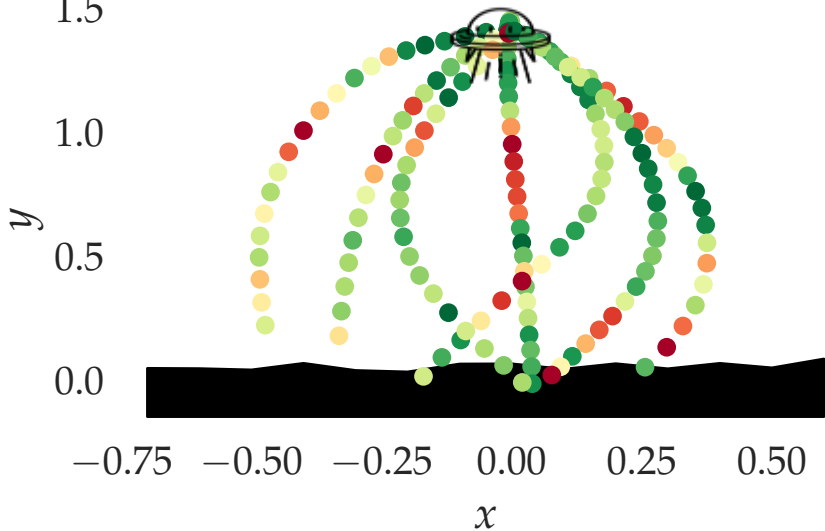

Supplement: supplementary_material [file attachment]

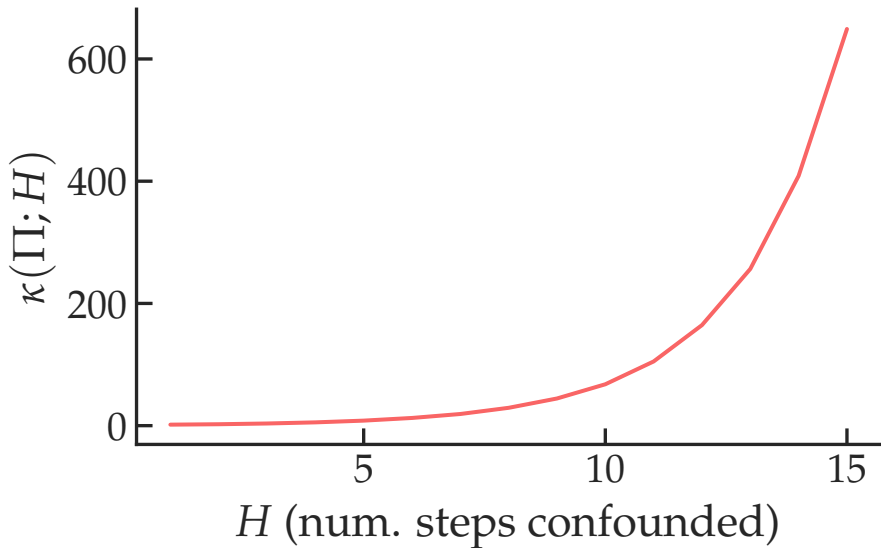

Supplement: supplementary_material [file attachment]

# Confounded MDP

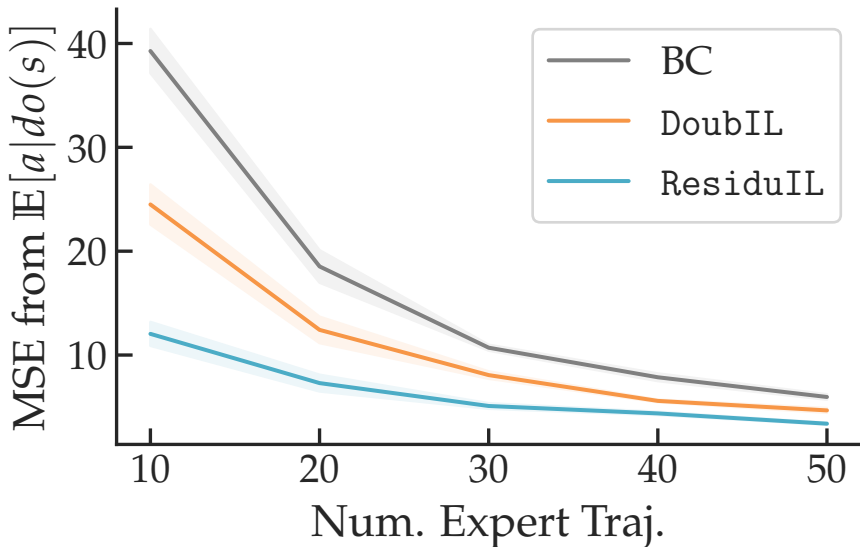

Supplement: supplementary_material [file attachment]

# Denoised MDP

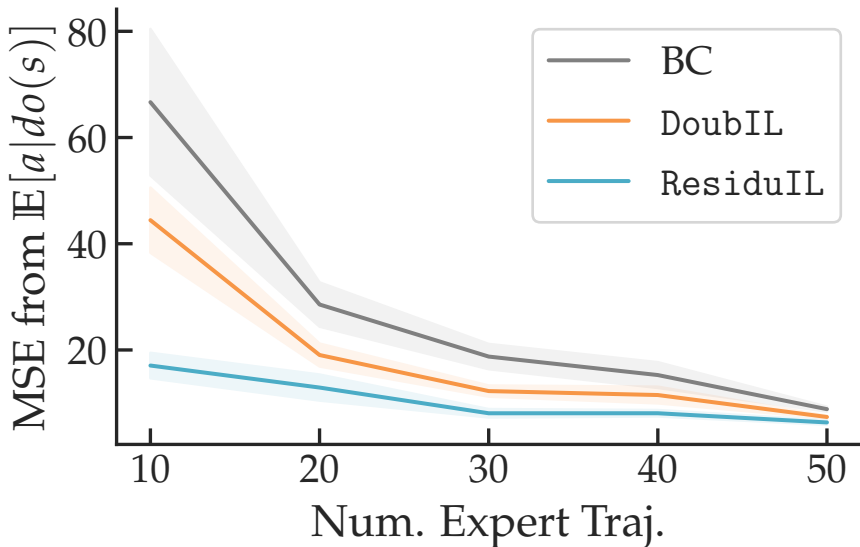

Supplement: supplementary_material [file attachment]
